# Supplementary material for: CEP135 isoform dysregulation promotes centrosome amplification in breast cancer cells
Source: PubMed Central journal article supplement — Mol Biol Cell. 2019 May 1;30(10):1230–44. doi: 10.1091/mbc.E18-10-0674 (PMC6724517; doi:10.1091/mbc.e18-10-0674), 2019-05-01
Supplement: mbc-30-1230-s001.pdf [file mbc-30-1230-s001.pdf]

# Supplemental Materials

*Molecular Biology of the Cell*

Sankaran et al.

## SUPPLEMENTAL FIGURE LEGEND

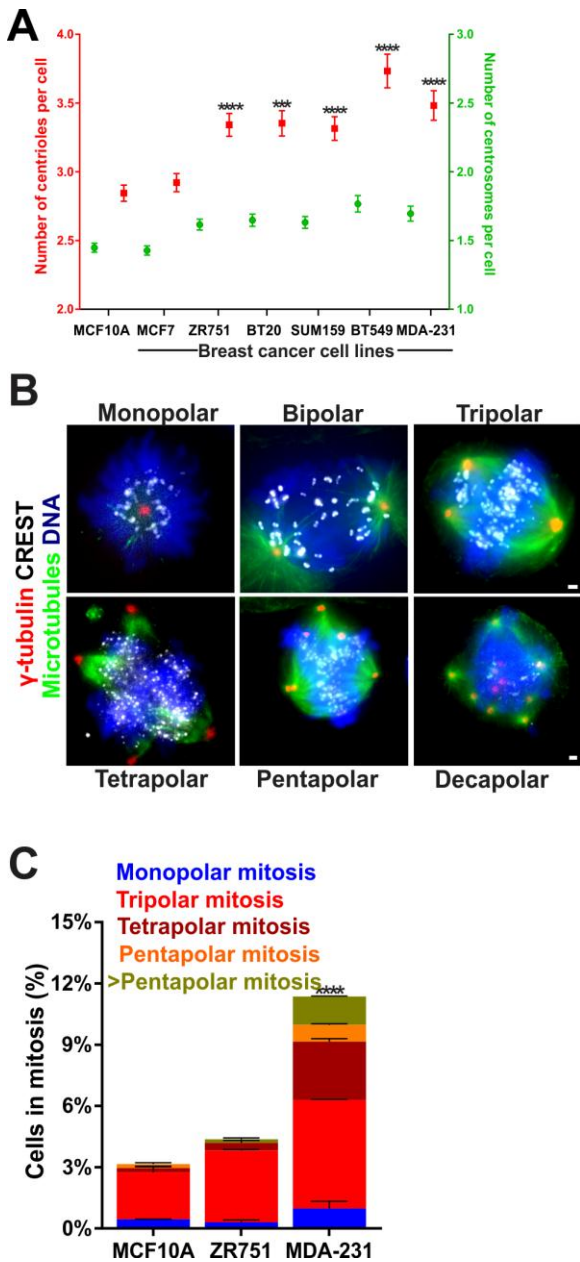

**Figure S1:** Aggressive breast cancer cells exhibit increased CA and chromosome mis-segregation. (A) Number of the total centrioles (red) and centrosomes (green) in all cell populations of breast cancer cell lines. (B) Monopolar, bipolar and multipolar mitoses in MDA-231 cells. Cells stained for PCM ( $\gamma$ -tubulin; red), microtubules ( $\alpha$ -tubulin; green), DNA (Hoechst 33342; blue) and kinetochores (CREST; grayscale). (C) Percentage of mitotic cells exhibiting monopolar, bipolar and multipolar mitosis. Mean $\pm$ SEM. (A,C) Statistical tests compare to MCF10A cells. Fischer's exact test and Mann-Whitney U test. \* $p<0.05$ , \*\* $p<0.01$ , \*\*\* $p<0.005$  and \*\*\*\* $p<0.0005$ . Scale bars, 1  $\mu$ m.

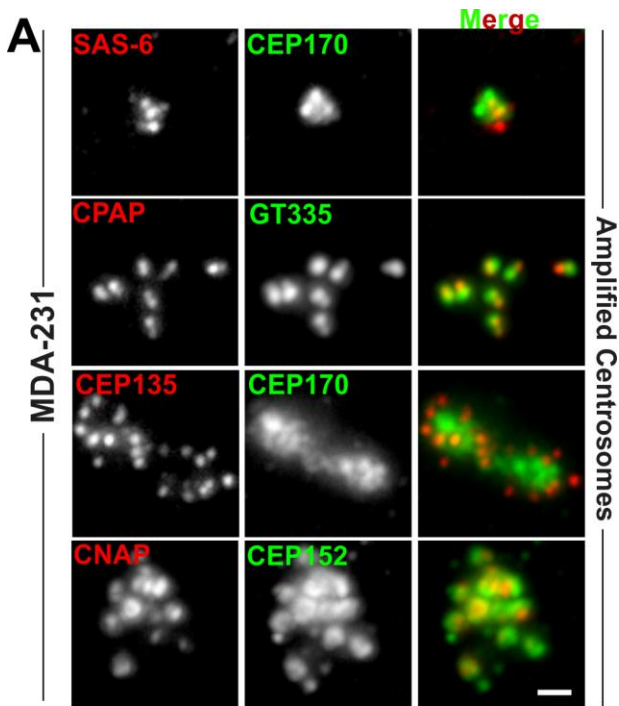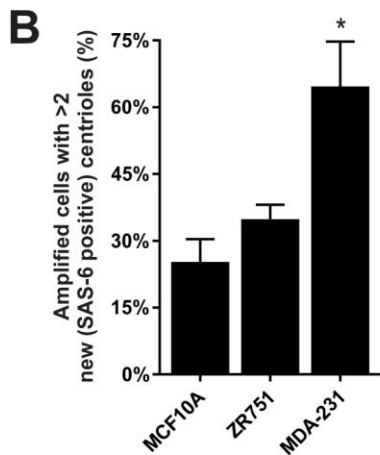

**Figure S2:** Centriole overduplication in breast cancer cells with amplified centrosomes. (A) Both non-amplified and amplified centrosomes contain a full complement of representative centriole proteins. Panels from top to bottom are centrosomes stained for SAS-6, CEP170; CPAP, glutamylated tubulin (GT335); CEP135, CEP170; CNAP and CEP152. (B) Percentage of cells with amplified centrosomes that show new centriole overduplication (based on SAS-6 foci). Mean $\pm$ SEM. Statistical tests compare to MCF10A cells. Student's t-test \* $p$ <0.05, \*\* $p$ <0.01, \*\*\* $p$ <0.005 and \*\*\*\* $p$ <0.0005. Scale bar, 1  $\mu$ m.

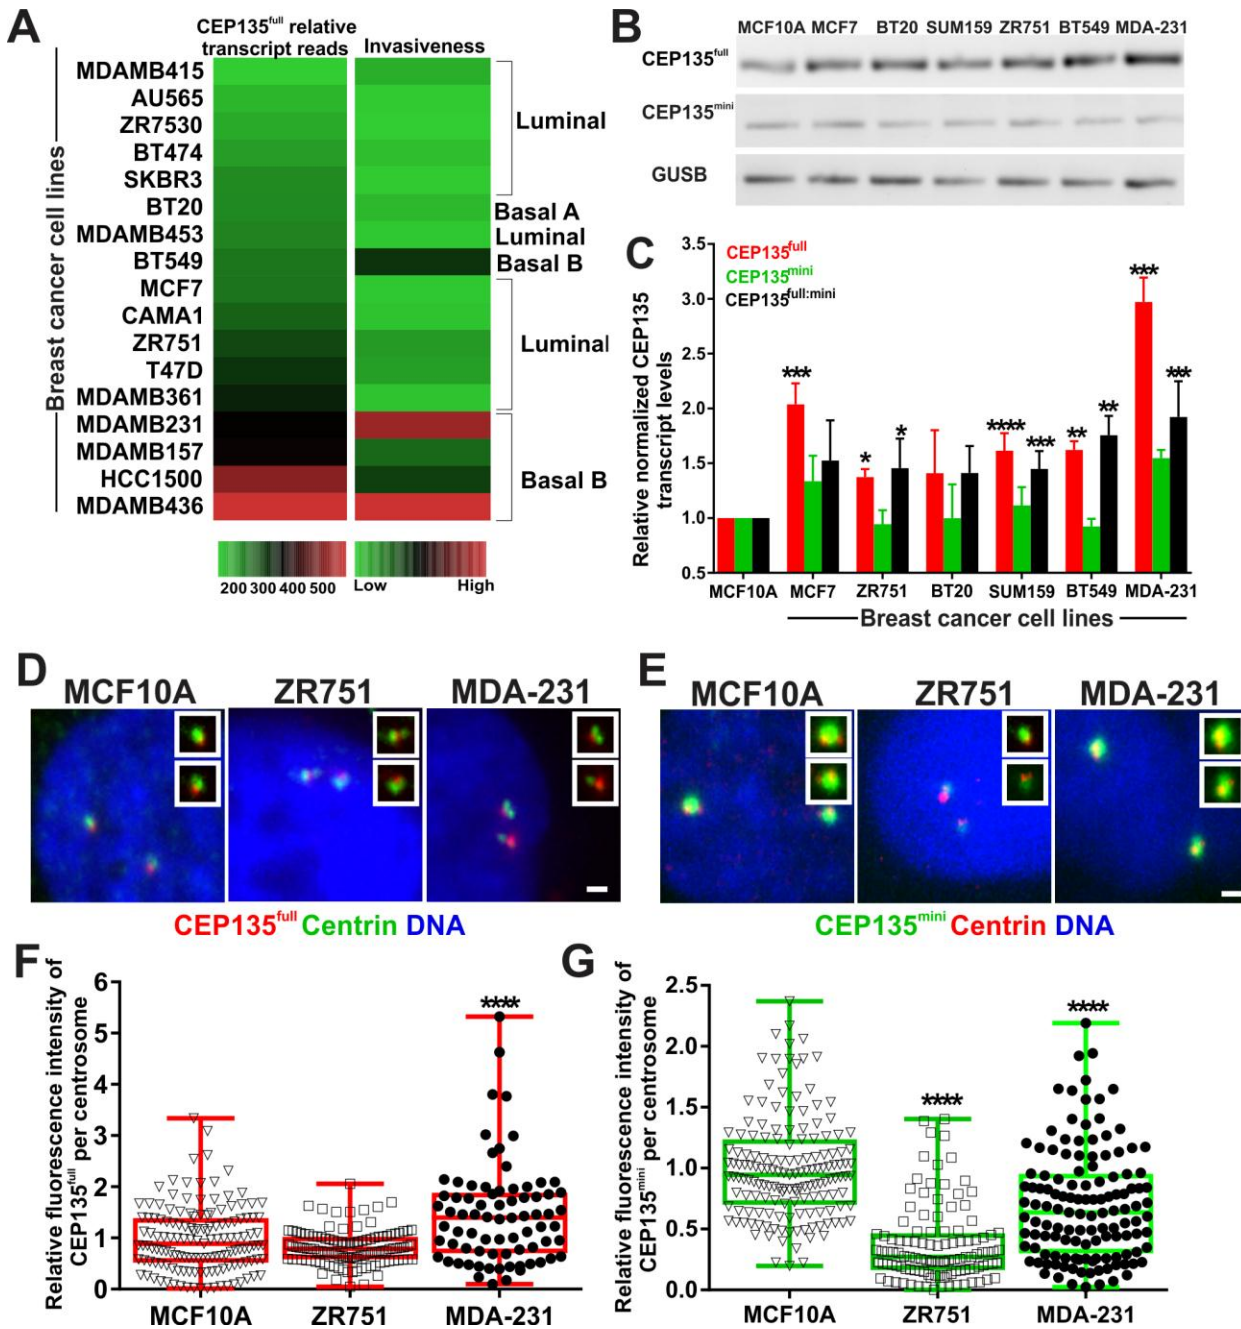

**Figure S3:** CEP135 transcript and protein levels are altered in breast cancer cells. (A) Comparison of CEP135<sup>full</sup> transcript reads and invasiveness in various breast cancer cell lines (Adapted from (Barretina et al., 2012; Neve et al., 2006)). (B) CEP135<sup>full</sup>, CEP135<sup>mini</sup> and GUSB (control) RT-PCR in breast cancer cells. (C) CEP135<sup>full</sup> (red) and CEP135<sup>mini</sup> (green) transcript levels normalized to GUSB levels and represented relative to their corresponding transcript levels in MCF10A cells. The CEP135<sup>full:mini</sup> transcript ratio (black) in breast cancer cells is also represented relative to MCF10A cells. (D) CEP135<sup>full</sup> (red) and centrin (green) at

centrosomes of G2 phase MCF10A, ZR751 and MDA-231 cells. Corresponding images in Figure 3E. (E) CEP135<sup>mini</sup> (green) and centrin (red) at centrosomes of G2 phase MCF10A, ZR751 and MDA-231 cells. Corresponding images in Figure 3F. (F) Quantification of CEP135<sup>full</sup> protein fluorescence intensity per G2 phase centrosome relative to MCF10A cells. (G) Quantification of CEP135<sup>mini</sup> protein fluorescence intensity per G2 phase centrosome relative to MCF10A cells. (C,F,G) Statistical tests compare to MCF10A cells. Mean±SEM. Student's t-test and Mann-Whitney U test. \*p<0.05, \*\*p<0.01, \*\*\*p<0.005 and \*\*\*\*p<0.0005. Scale bars, 1 μm.

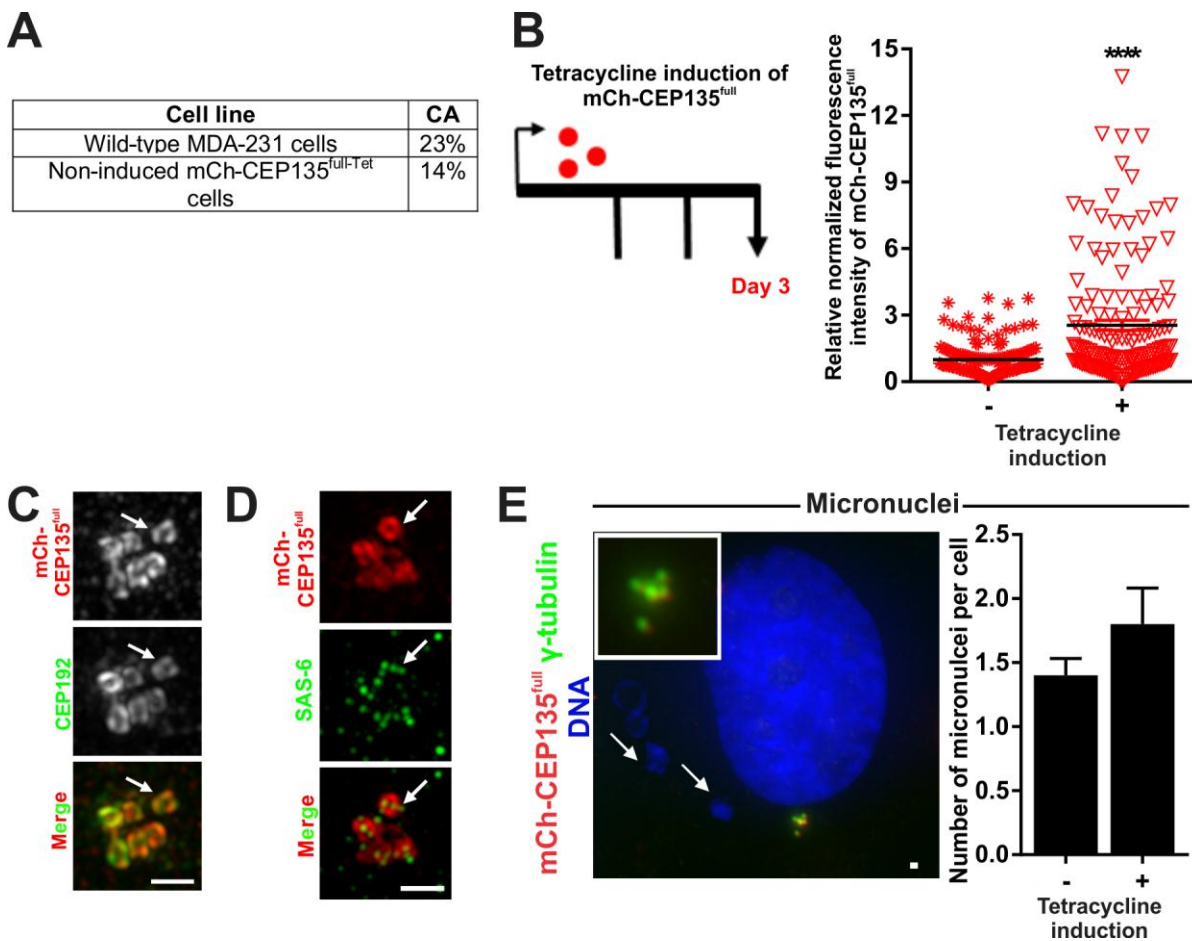

**Figure S4:** Elevated CEP135<sup>full</sup> expression increases centriole number, CA and chromosome mis-segregation in breast cancer cells. (A) CA frequency in control MDA-231 and non-induced mCh-CEP135<sup>Full-Tet</sup> MDA-231 cell lines. (B) Left panel, schematic of tetracycline-induced mCh-CEP135<sup>Full-Tet</sup> MDA-231 cells. Right panel, relative normalized fluorescence intensity of mCh-CEP135<sup>full</sup> in non-induced and induced mCh-CEP135<sup>full-Tet</sup> MDA-231 cells. (C) mCh-CEP135<sup>full</sup> (red) localization relative to CEP192 (green). Arrows denote centrosomes with mCh-

CEP135<sup>full</sup> at the cylinder walls. (D) mCh-CEP135<sup>full</sup> (red) localization relative to SAS-6 (green). Arrows denote SAS-6 foci at the core cylinder. (E) Left panel, micronuclei in mCh-CEP135<sup>Full-Tet</sup> MDA-231 cells. Arrows denote micronuclei. Right panel, micronuclei per cell in non-induced and induced mCherry-CEP135<sup>full-Tet</sup> MDA-231 cells. Mean±SEM. Mann-Whitney U test. \*p<0.05, \*\*p<0.01, \*\*\*p<0.005 and \*\*\*\*p<0.0005. Scale bars, 1 µm.

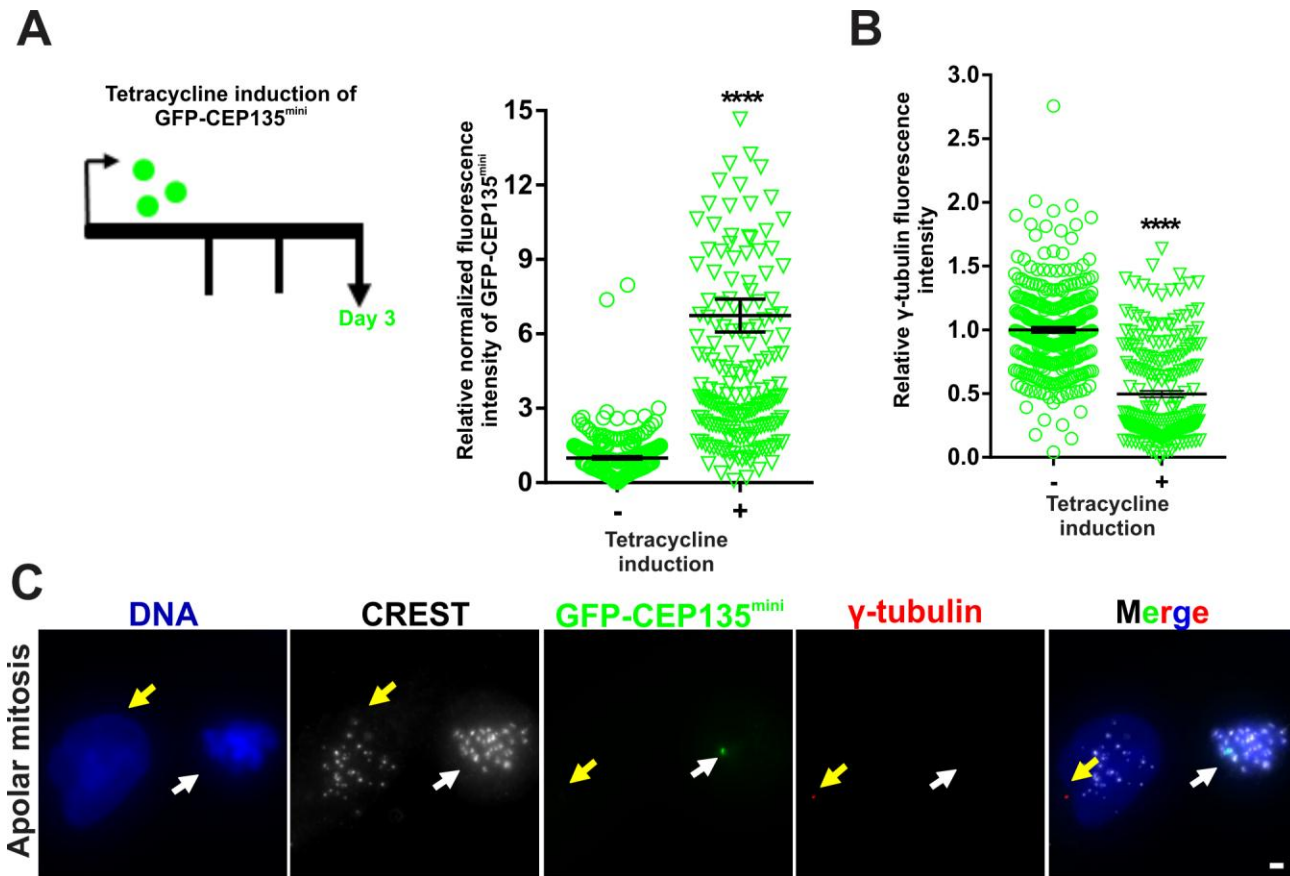

**Figure S5:** Elevated CEP135<sup>mini</sup> expression is sufficient to decrease CA and alters chromosome segregation in breast cancer cells. (A) Left panel, schematic of GFP-CEP135<sup>mini-Tet</sup> MDA-231 cell induction. Right panel, quantification of the normalized fluorescence intensity of GFP-CEP135<sup>mini-Tet</sup> relative to non-induced cells. (B) Quantification of the relative fluorescence intensity of  $\gamma$ -tubulin in non-induced and induced GFP-CEP135<sup>mini-Tet</sup> MDA-231 cells. (C) Apolar, mitotic (white arrow) and neighboring interphase (yellow arrow) GFP-CEP135<sup>mini-Tet</sup> MDA-231 cells. Cells were stained for PCM ( $\gamma$ -tubulin; red), DNA (Hoechst 33342; blue) and kinetochores (CREST; grayscale). Mean±SEM. Mann-Whitney U test. \*p<0.05, \*\*p<0.01, \*\*\*p<0.005 and \*\*\*\*p<0.0005. Scale bars, 1 µm.

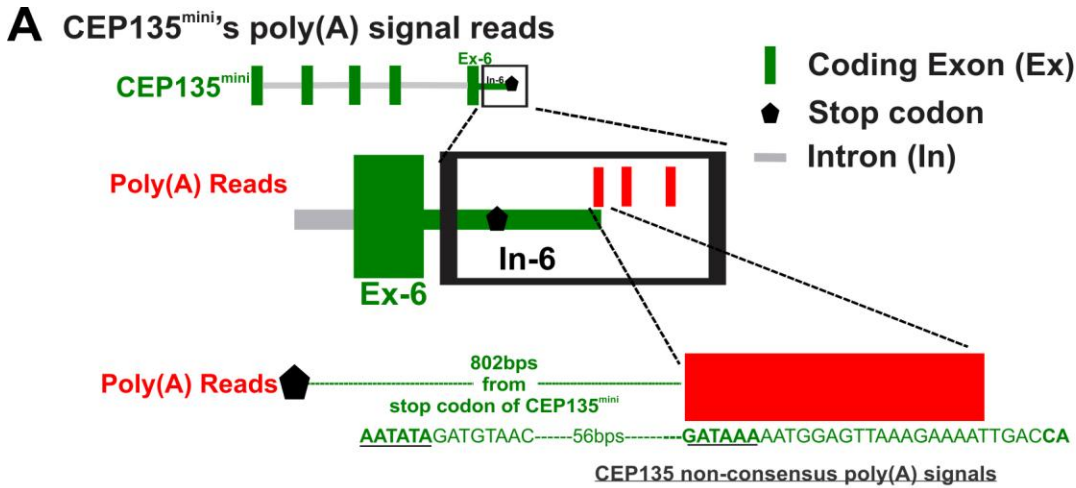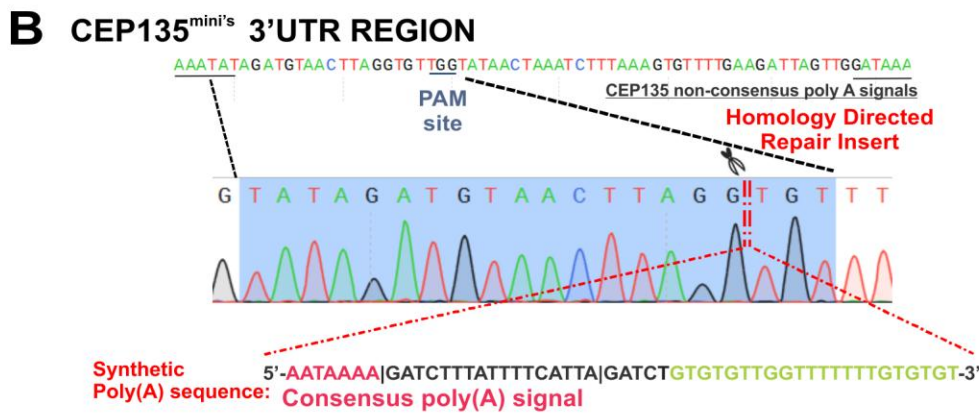

**C** MDA-231 CEP135 Intron 6 Wildtype sequence

sgRNA target sequence PAM

5'---AATATAGATGTAACCTTAGGCTGTGGTATAACTAAATCTTTA--3'

**3'UTR Mutant CRISPR-Cas9 alleles**

- Allele 1 5'---AATATAGATGTAACCTTAGG-107bps insertion-TGTGGTATAACTA--3'
- Allele 2 5'---AATATAGATGTAACCTTAGG-74bps insertion-TGTGGTATAACTA--3'
- Allele 3 5'---AATATAGATGTAACCTTAGG-1bp insertion-TGTGGTATAACTAA--3'

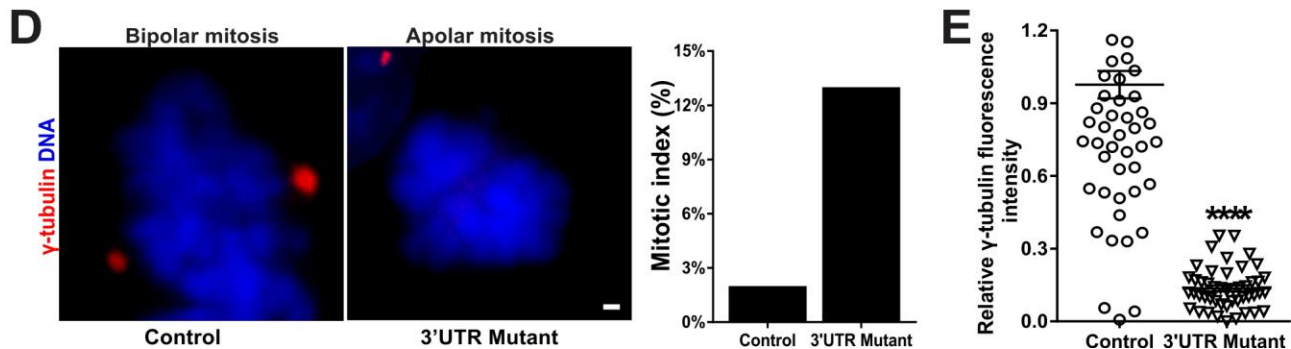

**Figure S6:** CEP135<sup>mini</sup> is an alternatively polyadenylated isoform, and mutations near the CEP135<sup>mini</sup> poly(A) signal reduce the CEP135<sup>full:mini</sup> ratio and centrosome number in breast cancer cells. (A) Top panel, schematic

of the CEP135<sup>mini</sup> gene. Green bars denote coding exons (Ex) of CEP135<sup>mini</sup>. Gray lines denote introns (In). Black pentagons denote translation stop codons. Middle panel, poly(A) signal reads (red) in intron 6 of the CEP135 locus from the 3'READS+ dataset (Zheng et al., 2016). Bottom panel, magnified view of the first poly(A) signal read (red) that is 802bps downstream of the CEP135<sup>mini</sup> stop codon (pentagon). Underlined sequences represent CEP135<sup>mini</sup>'s predicted polyadenylation signals and cleavage sites. (B) Top panel, the predicted poly(A) signals AAUAUA and GAUAAA in CEP135<sup>mini</sup>'s 3'UTR region. Middle panel, 20 nucleotide Cas9 target region in CEP135's intron 6 utilized for the design of gRNA along with the PAM site (blue). Bottom panel, Synthetic poly(A) signal attempted for homology directed repair (HDR) knock-in into CEP135 intron 6. (C) Sequence of CEP135<sup>mini</sup> 3'UTR CRISPR-induced mutant alleles. (D) Left panel, bipolar mitosis in a control MDA-231 cell and apolar mitosis in a CEP135<sup>mini</sup> 3'UTR Mutant MDA-231 cell. Cells were stained for PCM ( $\gamma$ -tubulin, red) and chromosomes (Hoechst 33342, blue). Right panel, percentage of cells in mitosis in control and 3'UTR Mutant MDA-231 cells. (E) Relative  $\gamma$ -tubulin fluorescence intensity in control and 3'UTR Mutant MDA-231 cells. Mean $\pm$ SEM. Mann-Whitney U test. \* $p < 0.05$ , \*\* $p < 0.01$ , \*\*\* $p < 0.005$  and \*\*\*\* $p < 0.0005$ . Scale bars, 1  $\mu$ m.
